# Supplementary material
Source: PubMed Central journal article supplement (PMC7787049)
Supplement: NIHMS1546624-supplement-1.pdf [file NIHMS1546624-supplement-1.pdf]

| Tree Number | Year  |      |       |      |      |      |       |      |       |      |       |      |       |       |       |      |      |       |      |      |      |       |       |      |       |      |       |
|-------------|-------|------|-------|------|------|------|-------|------|-------|------|-------|------|-------|-------|-------|------|------|-------|------|------|------|-------|-------|------|-------|------|-------|
|             | 1989  | 1990 | 1991  | 1992 | 1993 | 1994 | 1995  | 1996 | 1997  | 1998 | 1999  | 2000 | 2001  | 2002  | 2003  | 2004 | 2005 | 2006  | 2007 | 2008 | 2009 | 2010  | 2011  | 2012 | 2013  | 2014 | 2015  |
| 1           | 0.304 | 0    | 0.109 | 0    | 0    | 0    | 0.156 | 0    | 0.416 | 0    | 0.153 | 0    | 0.005 | 0.016 | 0.169 | 0    | 0    | 0.063 | 0    | 0    | 0    | 0.029 | 0.490 | 0    | 0.379 | 0    | 0.464 |
| 2           | 0.435 | 0    | 0.102 | 0    | 0    | 0    | 0.131 | 0    | 0.288 | 0    | 0.289 | 0    | 0.000 | 0.275 | 0.076 | 0    | 0    | 0.106 | 0    | 0    | 0    | 0.039 | 0.146 | 0    | 0.094 | 0    |       |
| 3           | 0.376 | 0    | 0.349 | 0    | 0    | 0    | 0.193 | 0    | 0.029 | 0    | 0.144 | 0    | 0.062 | 0.004 | 0.021 | 0    | 0    | 0.021 | 0    | 0    | 0    | 0.274 | 0.371 | 0    | 0.149 | 0    | 0.608 |
| 4           | 0.310 | 0    | 0.013 | 0    | 0    | 0    | 0.233 | 0    | 0.022 | 0    | 0.015 | 0    | 0.002 | 0.025 | 0.037 | 0    | 0    | 0.002 | 0    | 0    | 0    | 0.002 | 0.174 | 0    | 0.000 | 0    | 0.041 |
| 5           | 0.347 | 0    | 0.199 | 0    | 0    | 0    | 0.432 | 0    | 0.410 | 0    | 0.187 | 0    | 0.033 | 0.042 | 0.126 | 0    | 0    | 0.287 | 0    | 0    | 0    | 0.125 | 0.124 | 0    | 0.207 | 0    | 0.319 |
| 6           | 0.292 | 0    | 0.010 | 0    | 0    | 0    | 0.502 | 0    | 0.087 | 0    | 0.083 | 0    | 0.007 | 0.013 | 0.085 | 0    | 0    | 0.044 | 0    | 0    | 0    | 0.097 | 0.041 | 0    | 0.162 | 0    | 0.403 |
| 7           | 0.710 | 0    | 0.023 | 0    | 0    | 0    | 0.647 | 0    | 0.236 | 0    | 0.234 | 0    | 0.014 | 0.028 | 0.085 | 0    | 0    | 0.019 | 0    | 0    | 0    | 0.166 | 0.214 | 0    | 0.183 | 0    | 0.218 |
| 8           | 0.674 | 0    | 0.273 | 0    | 0    | 0    | 0.938 | 0    | 0.419 | 0    |       |      |       |       |       |      |      |       |      |      |      |       |       |      |       |      |       |
| 9           | 0.516 | 0    | 0.204 | 0    | 0    | 0    | 0.392 | 0    | 0.218 | 0    | 0.333 | 0    | 0.063 | 0.046 | 0.543 | 0    | 0    | 0.402 | 0    | 0    | 0    | 0.346 | 0.192 | 0    | 0.497 | 0    | 0.563 |
| 10          | 0.289 | 0    | 0.142 | 0    | 0    | 0    | 0.295 | 0    | 0.211 | 0    | 0.284 | 0    | 0.010 | 0.002 | 0.011 | 0    | 0    |       |      |      |      |       |       |      |       |      |       |
| 11          | 0.139 | 0    | 0.009 | 0    | 0    | 0    | 0.545 | 0    | 0.674 | 0    | 0.105 | 0    | 0.000 | 0.094 | 0.156 | 0    | 0    | 0.445 | 0    | 0    | 0    | 0.209 | 0.083 | 0    | 0.124 | 0    | 0.117 |
| 12          | 0.319 | 0    | 0.107 | 0    | 0    | 0    | 0.439 | 0    | 0.260 | 0    | 0.106 | 0    | 0.008 | 0.038 | 0.051 | 0    | 0    | 0.106 | 0    | 0    | 0    | 0.070 | 0.132 | 0    | 0.070 | 0    | 0.090 |
| Total (kg)  | 4.710 | 0    | 1.540 | 0    | 0    | 0    | 4.904 | 0    | 3.270 | 0    | 1.934 | 0    | 0.203 | 0.584 | 1.359 | 0    | 0    | 1.496 | 0    | 0    | 0    | 1.359 | 1.966 | 0    | 1.864 | 0    | 2.822 |
| Mean (kg)   | 0.428 | 0    | 0.140 | 0    | 0    | 0    | 0.446 | 0    | 0.297 | 0    | 0.176 | 0    | 0.018 | 0.053 | 0.124 | 0    | 0    | 0.136 | 0    | 0    | 0    | 0.124 | 0.179 | 0    | 0.169 | 0    | 0.257 |
| SE (kg)     | 0.048 | 0    | 0.032 | 0    | 0    | 0    | 0.067 | 0    | 0.054 | 0    | 0.029 | 0    | 0.007 | 0.023 | 0.043 | 0    | 0    | 0.048 | 0    | 0    | 0    | 0.033 | 0.039 | 0    | 0.043 | 0    | 0.061 |
| Median (kg) | 0.333 | 0    | 0.108 | 0    | 0    | 0    | 0.412 | 0    | 0.248 | 0    | 0.153 | 0    | 0.008 | 0.028 | 0.085 | 0    | 0    | 0.085 | 0    | 0    | 0    | 0.111 | 0.160 | 0    | 0.155 | 0    | 0.319 |

**Table S1** - Annual acorn yield (Kg m<sup>-2</sup>) for a population of 12 *Quercus robur* trees growing on Southampton Common (50.9262°N, 1.4092°W), southern England. Acorn yield was quantified using four transects placed north, south, east and west extending from the base of the trunk to the edge of the canopy for each tree. Trees 8 and 10 became engulfed by brambles; tree 2 suffered major branch damage. Acorn yield from each 'sample' and the estimate for the 'total' for each individual tree (i.e. sample mass × 14.7) are shown. Hanley, Cook & Fenner (July 2017)
